# Supplementary material for: A novel graphene barrier against moisture by multiple stacking large-grain graphene
Source: PubMed Central journal article supplement (PMC6405749; doi:10.1038/s41598-019-40534-5), 2019-03-07
Supplement: 41598_2019_40534_MOESM1_ESM.pdf [file 41598_2019_40534_MOESM1_ESM.pdf]

## Supplementary Information

### **A novel graphene barrier against moisture by multiple stacking large-grain graphene**

**Ploybussara Gomasang**<sup>1</sup>, **Kenji Kawahara**<sup>2</sup>, **Kenta Yasuraoka**<sup>3</sup>, **Mina Maruyama**<sup>3</sup>, **Hiroki Ago**<sup>2</sup>, **Susumu Okada**<sup>3</sup>, and **Kazuyoshi Ueno**<sup>1, 4,\*</sup>

<sup>1</sup> Graduate School of Engineering and Science, Shibaura Institute of Technology, Koto, Tokyo 135-8548, Japan

<sup>2</sup> Global Innovation Center, Kyushu University, Kasuga, Fukuoka 816-8580, Japan

<sup>3</sup> Graduate School of Pure and Applied Sciences, University of Tsukuba, Tsukuba, Ibaraki, 305-8577, Japan

<sup>4</sup> SIT Research Center for Green Innovation, Koto, Tokyo 135-8548, Japan

[\\*ueno@shibaura-it.ac.jp](mailto:*ueno@shibaura-it.ac.jp)

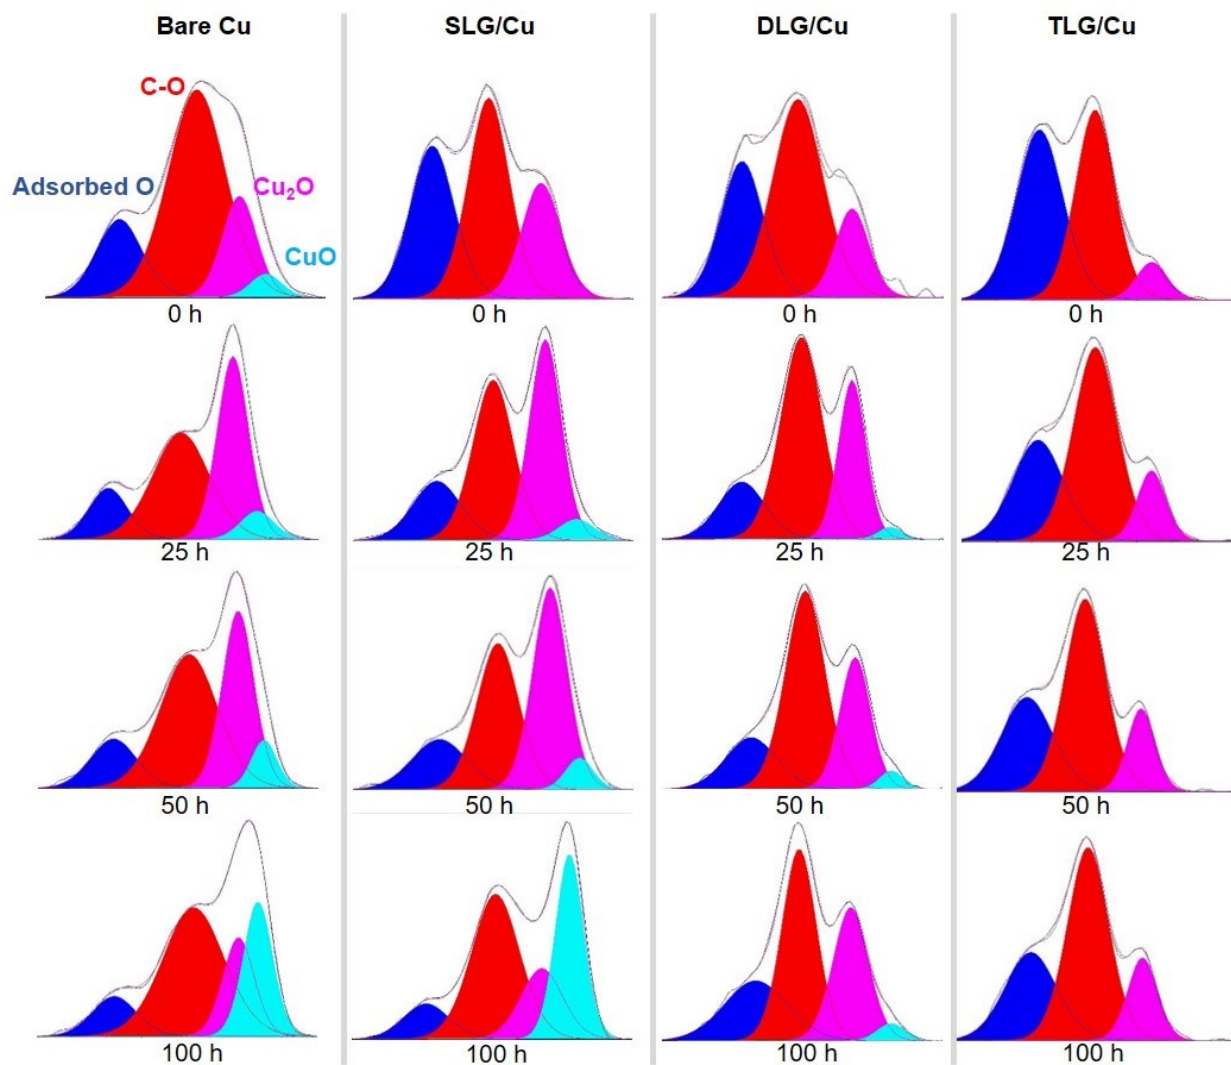

**Supplementary Figure S1. O 1s curve fittings showing the amount of O atom in Cu<sub>2</sub>O, CuO, C–O bonds, and adsorbed O on each sample surface. The evolution of O atoms in the Cu<sub>2</sub>O and CuO components of the O 1s spectra corresponds to the analysis of the Cu 2p spectra. Adsorbed O and C–O components were omitted in the calculation of O/Cu ratios.**

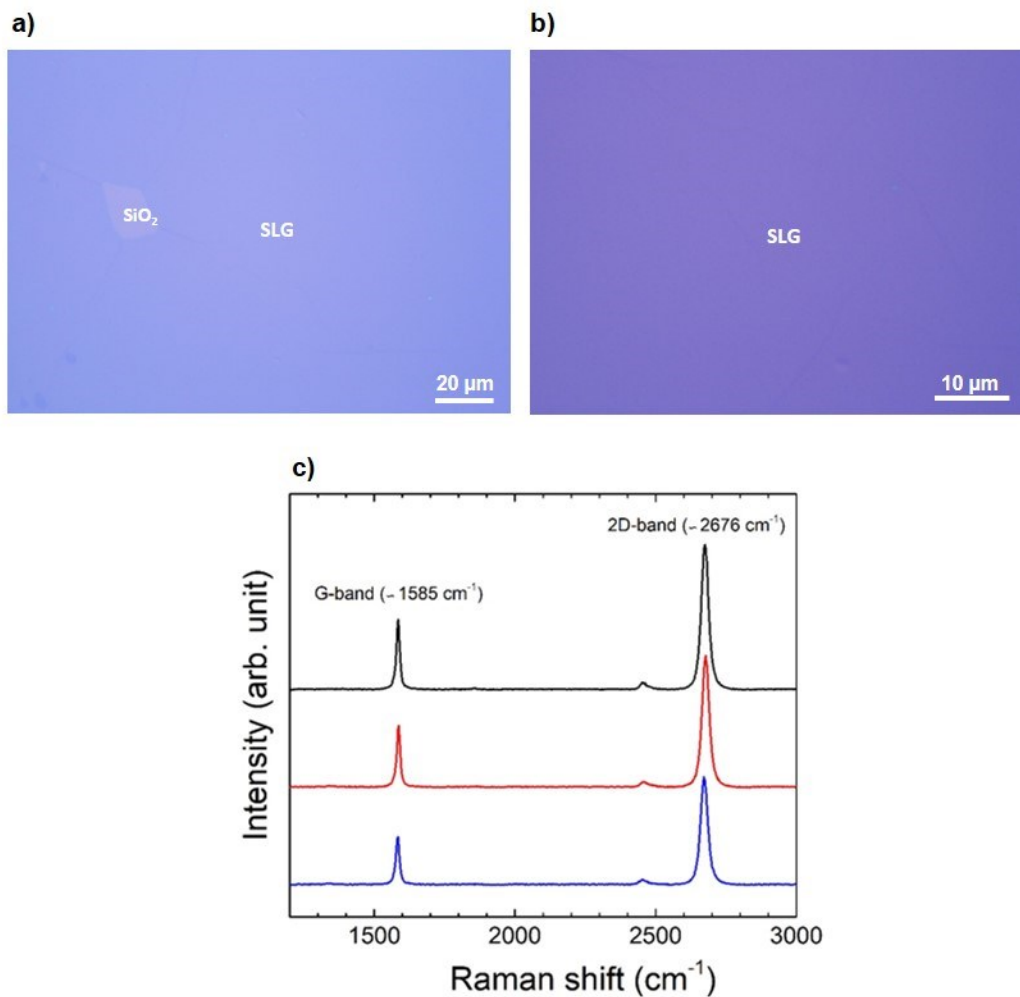

**Supplementary Figure S2. Characterization of SLG.** Panels (a and b) show Optical micrographs of SLG grown on Cu(111)/sapphire substrate after transferring the film to a SiO<sub>2</sub> (300 nm)/Si substrate. For panel (a), we chose the area with a hole showing bare SiO<sub>2</sub> to demonstrate that the growth of uniform SLG, almost free from multilayers. Panel (c) shows Raman spectra measured on the transferred SLG surface (excitation wavelength of 532 nm).
